# Supplementary material
Source: publisher figshare collection journal article supplement (https://tandf.figshare.com/articles/dataset/_/1568337)
Supplement: Supplementary file 1 [file 6]

Archive with 8 entries (8 files):
- Figure S1.pdf
- Figure S2.pdf
- Figure S3.pdf
- Figure S4.pdf
- Figure S5.pdf
- Figure S6.pdf
- Figure S7.pdf
- Table S1.doc
