# Supplementary material
Source: publisher figshare collection journal article supplement (https://tandf.figshare.com/articles/dataset/_/1568337)

Figure S1:

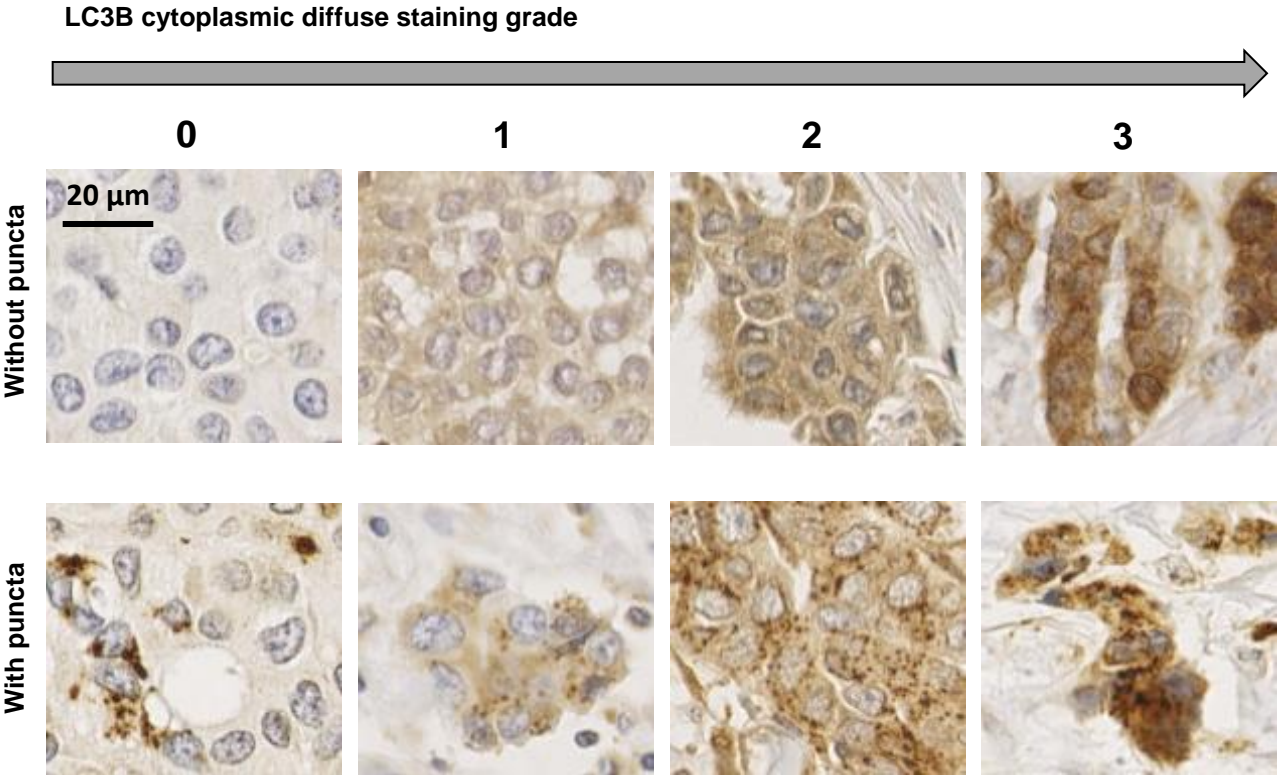

Supplement: Supplementary file 1 [file 6 › Figure S1.pdf]

**Figure S2:**

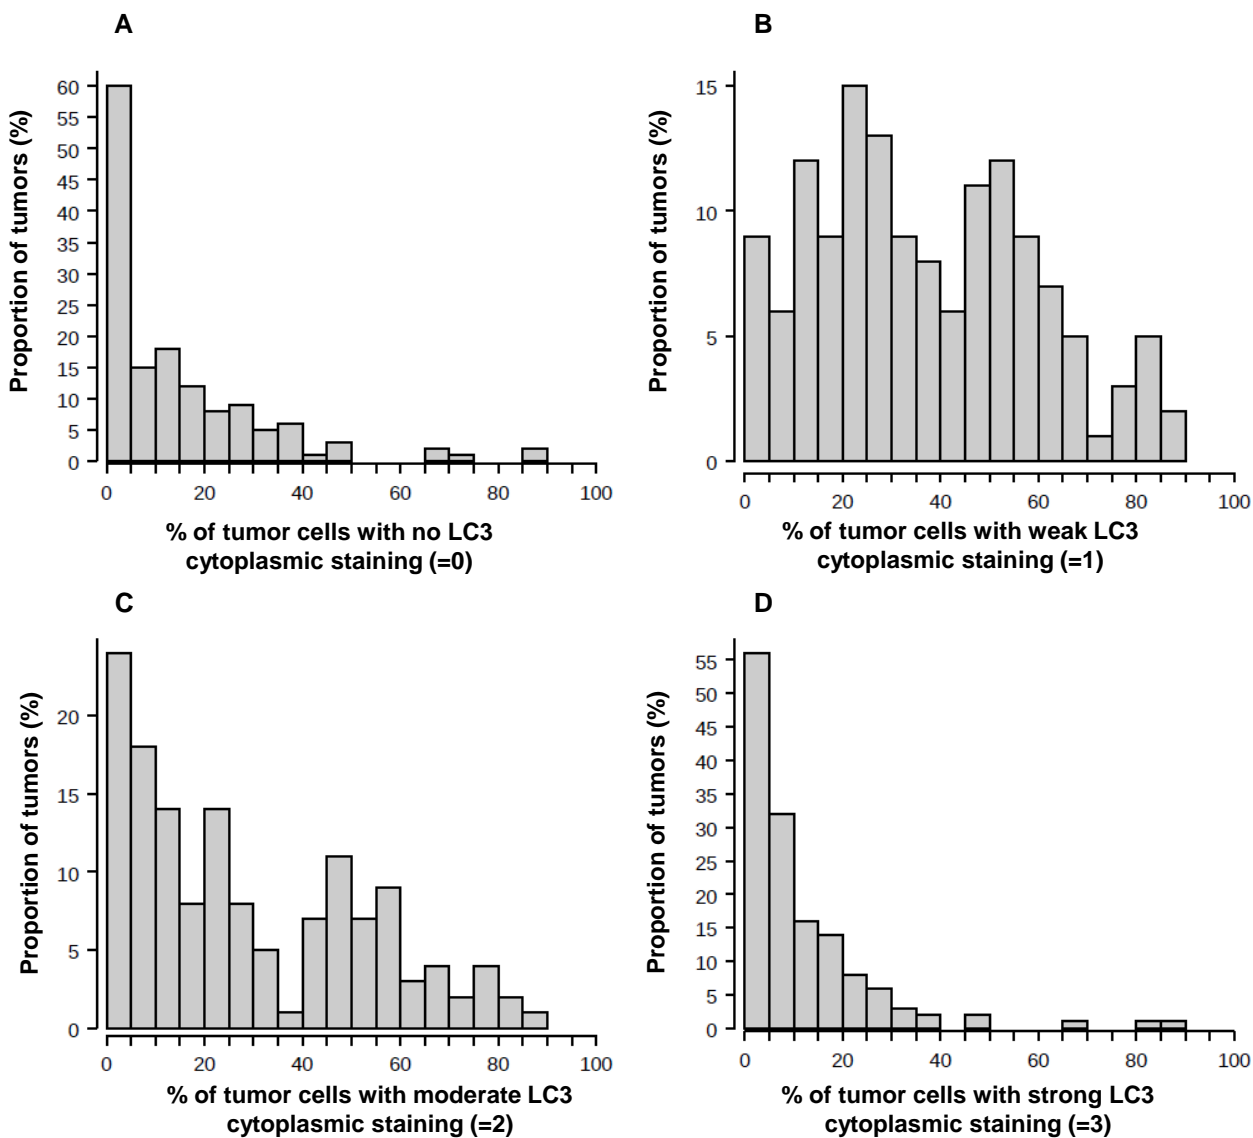

Supplement: Supplementary file 1 [file 6 › Figure S2.pdf]

Figure S3

A

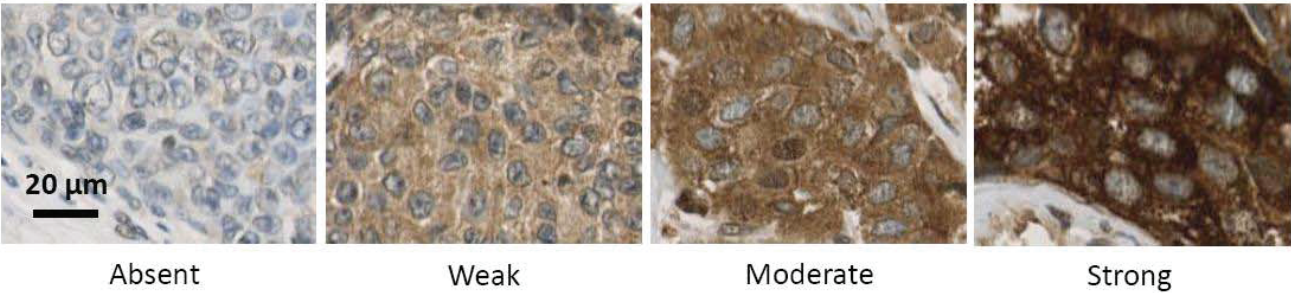

B

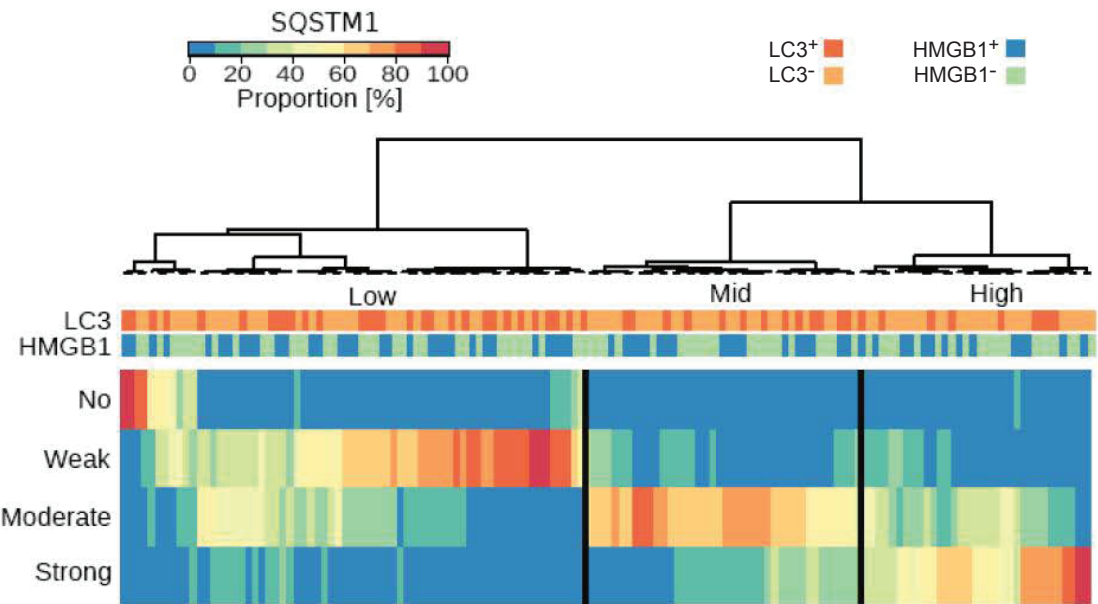

C

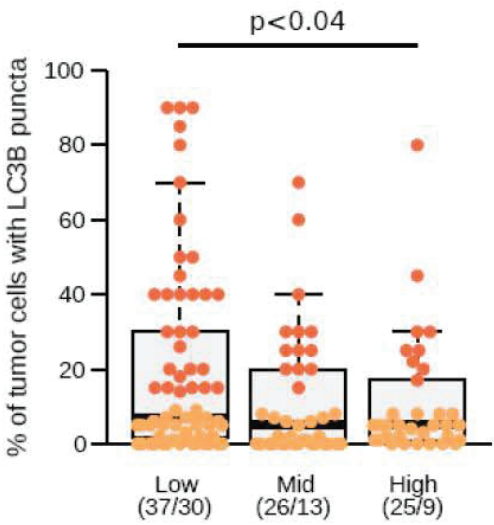

D

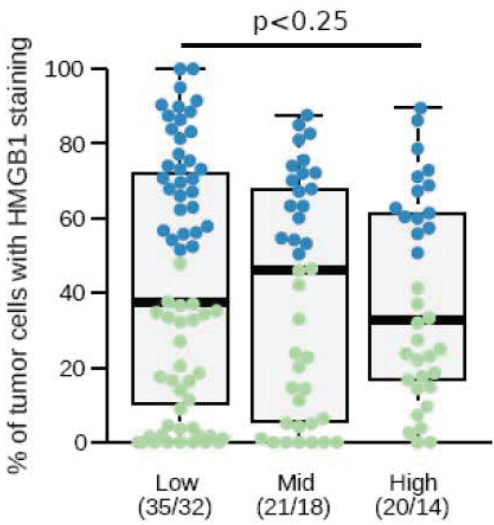

Supplement: Supplementary file 1 [file 6 › Figure S3.pdf]

**Figure S4:**

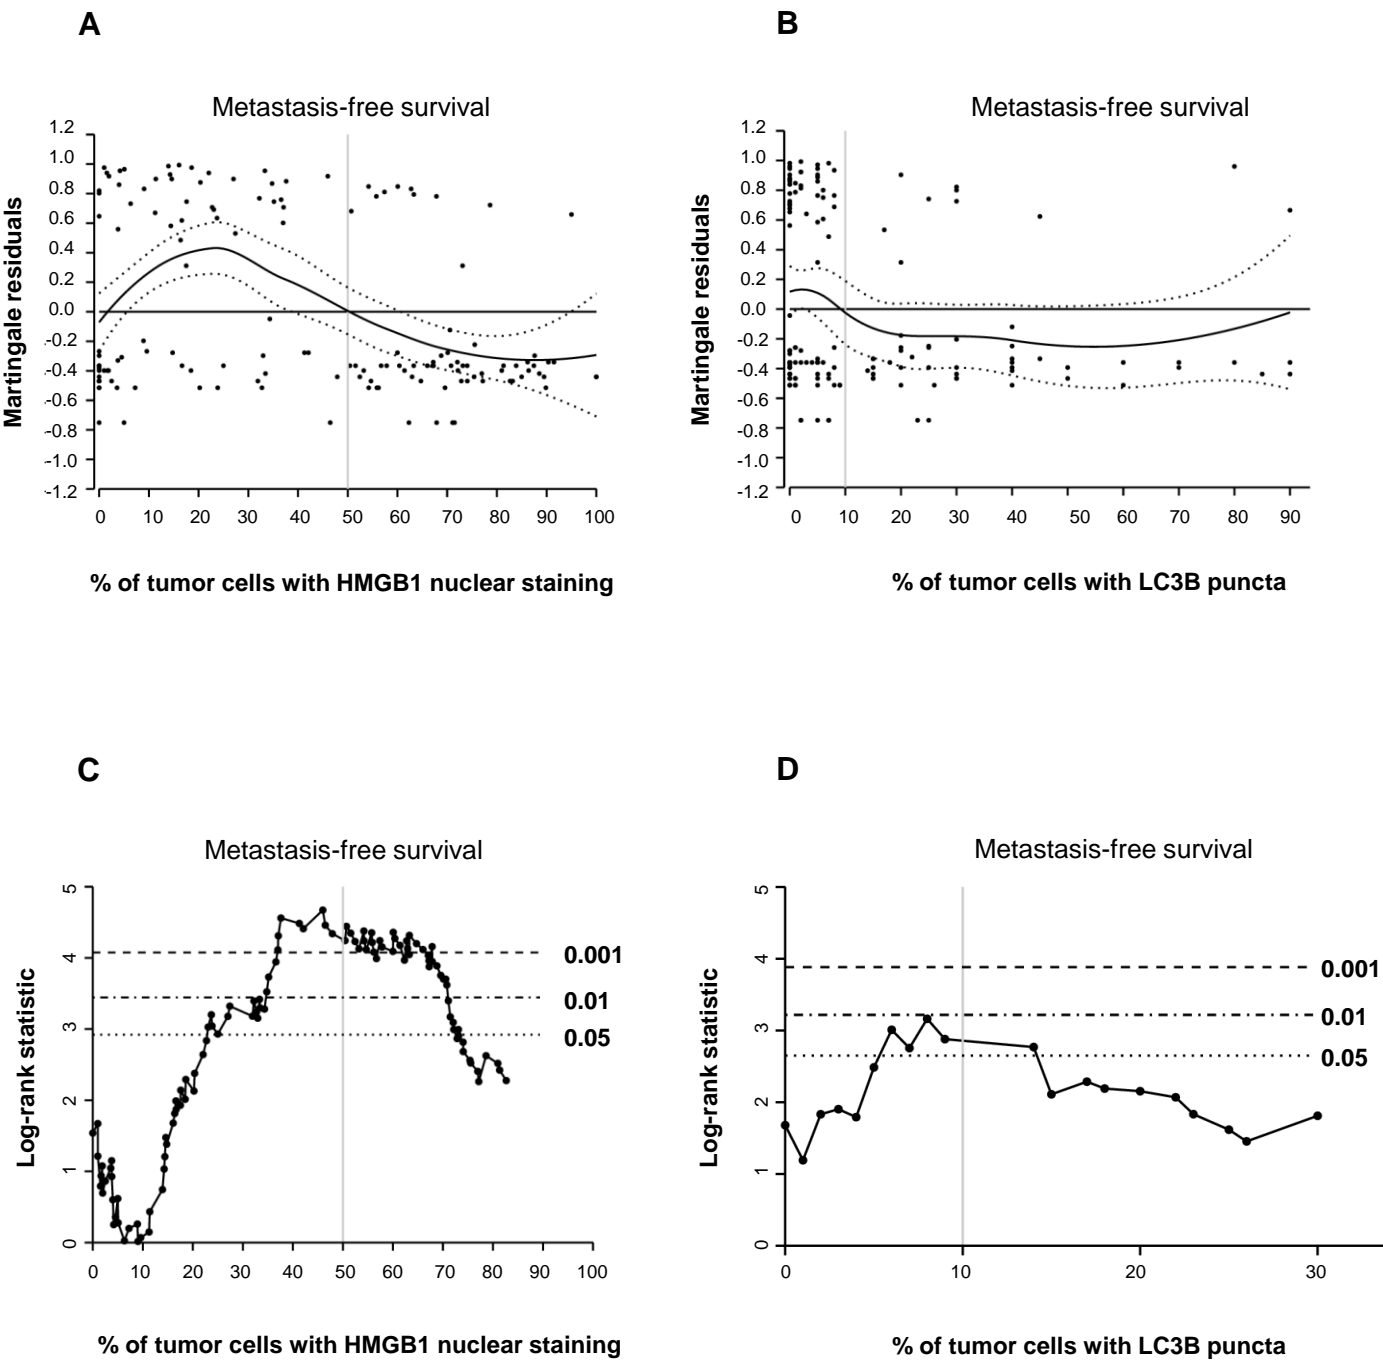

Supplement: Supplementary file 1 [file 6 › Figure S4.pdf]

**Figure S5:**

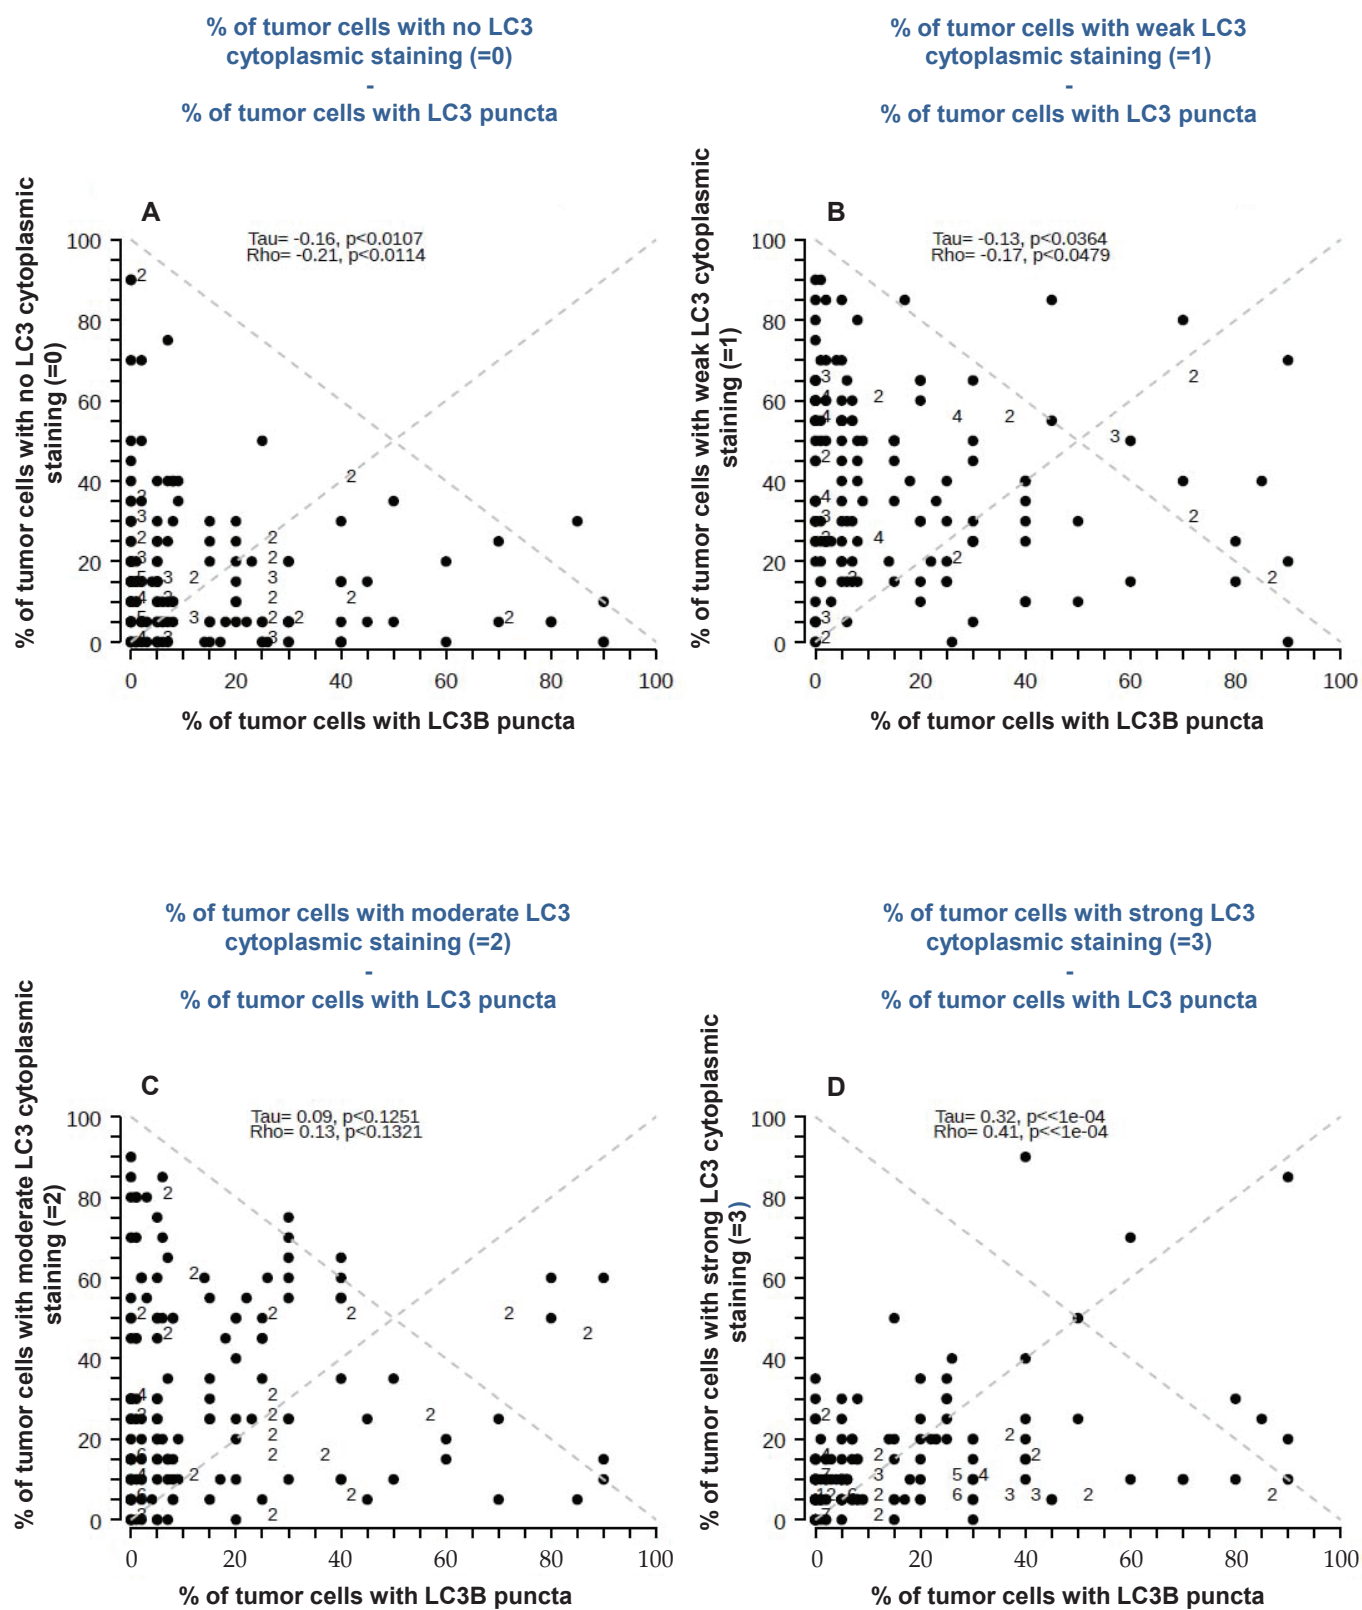

Supplement: Supplementary file 1 [file 6 › Figure S5.pdf]

**Figure S6:**

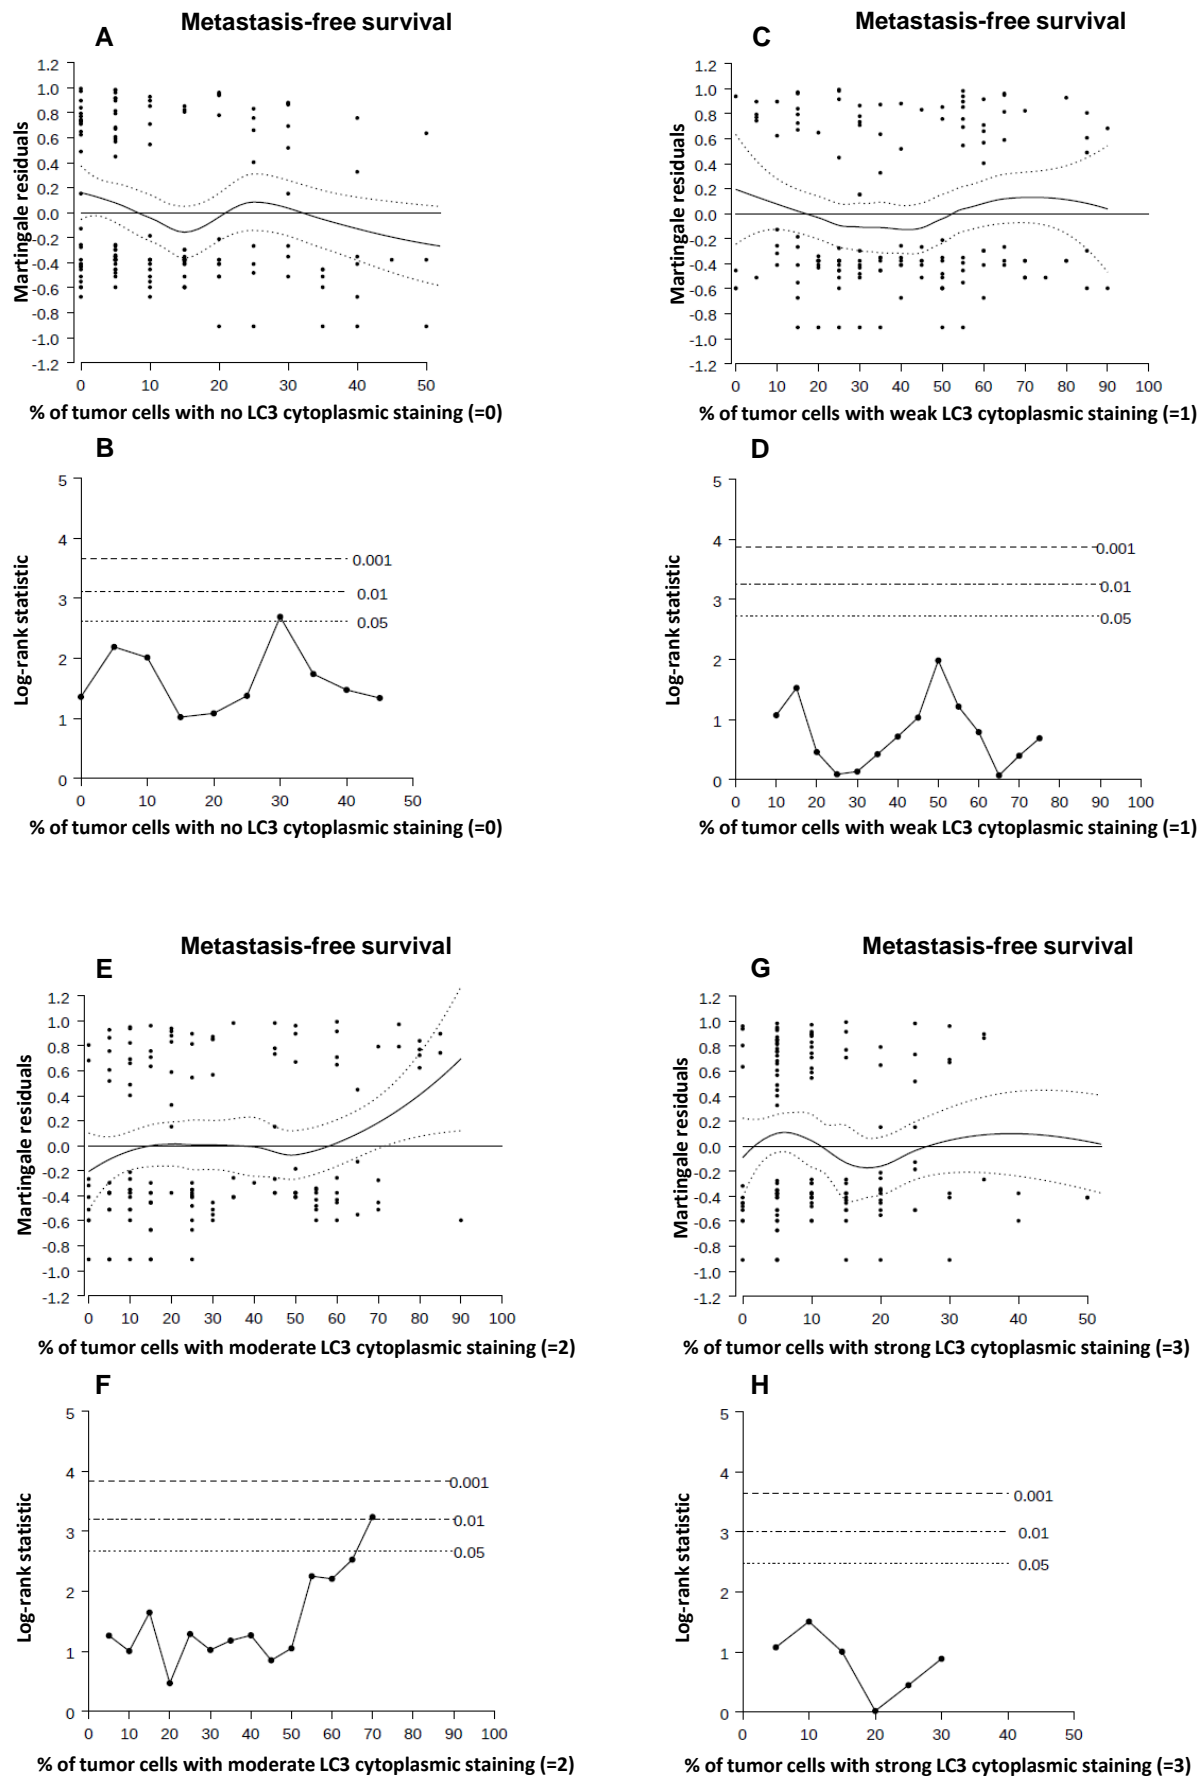

Supplement: Supplementary file 1 [file 6 › Figure S6.pdf]

**Figure S7:**

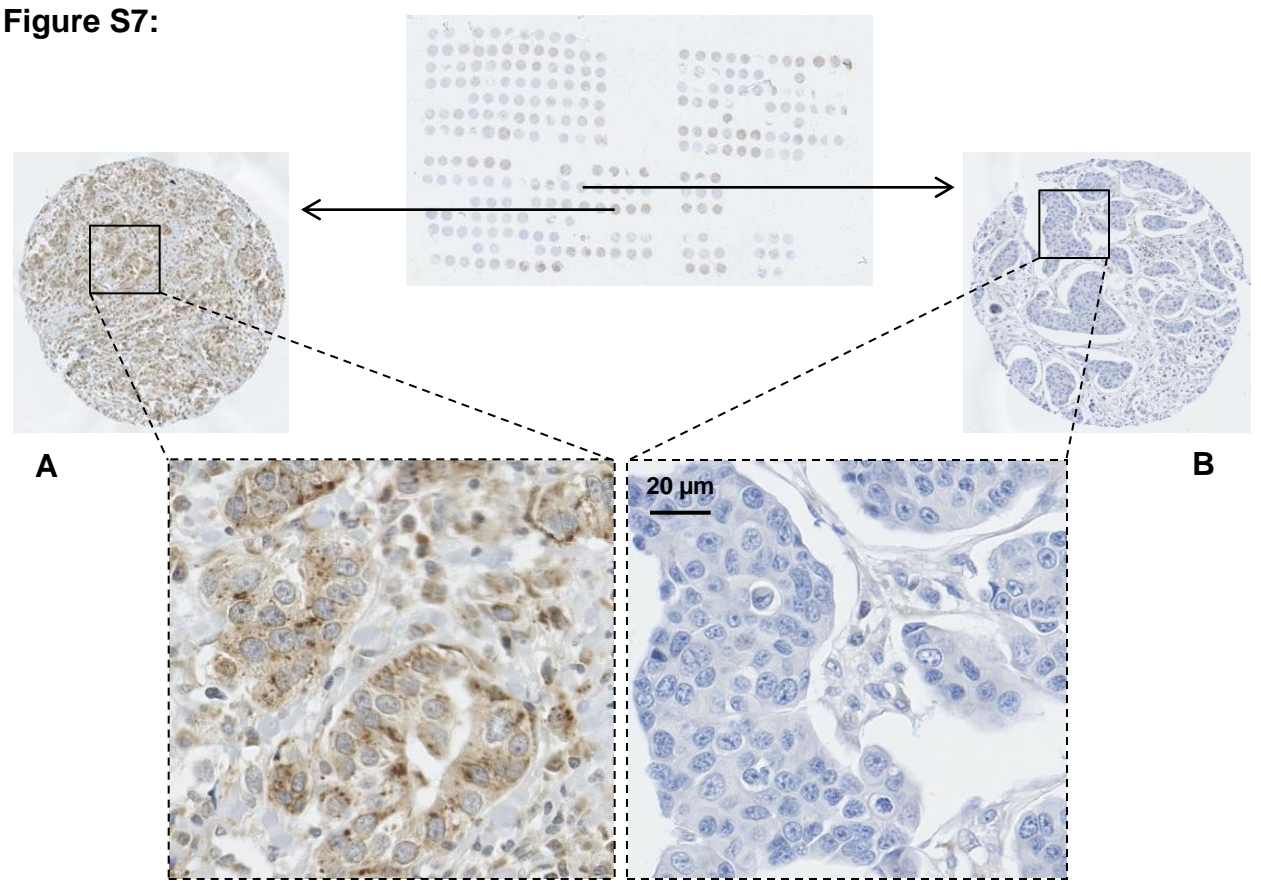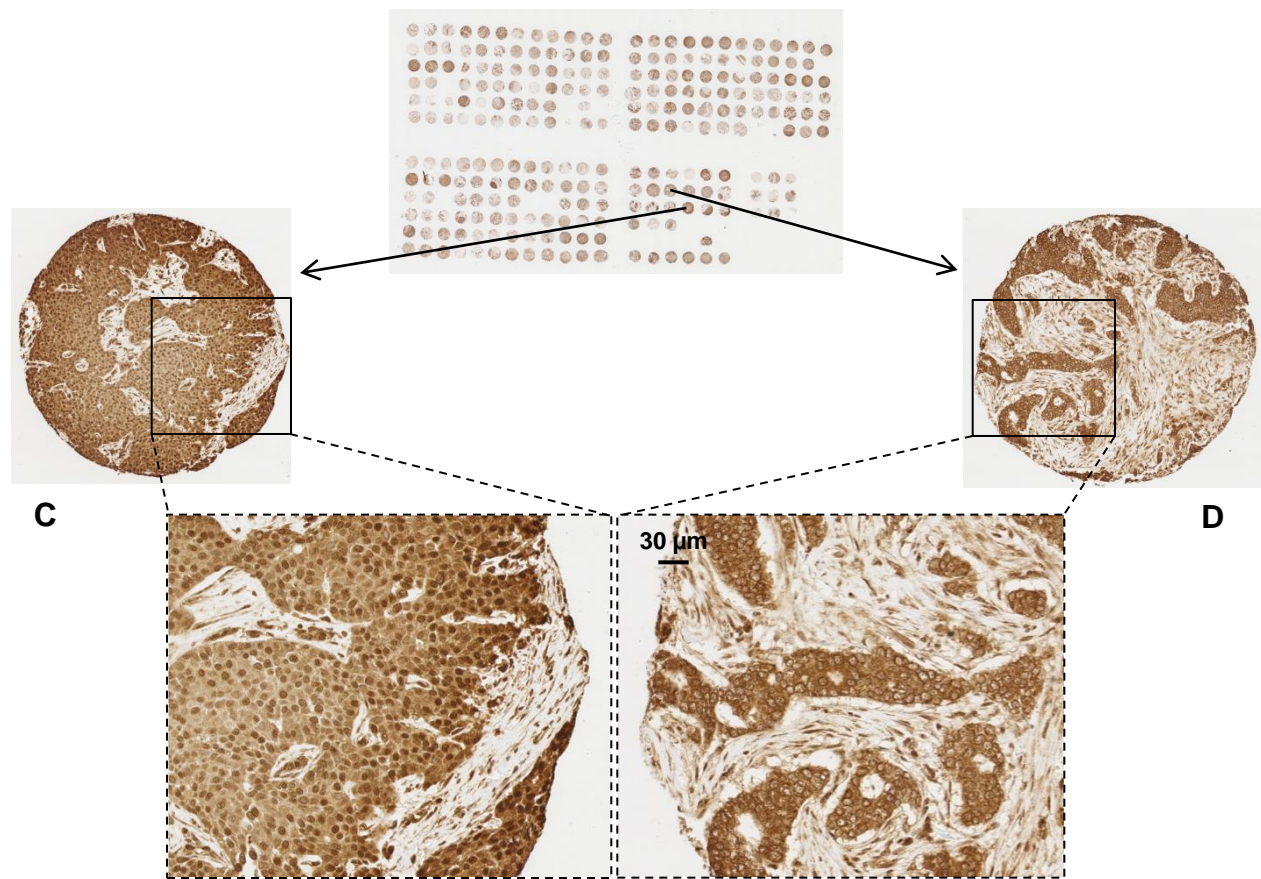

Supplement: Supplementary file 1 [file 6 › Figure S7.pdf]
